# Supplementary material
Source: PubMed Central journal article supplement (PMC6409197)

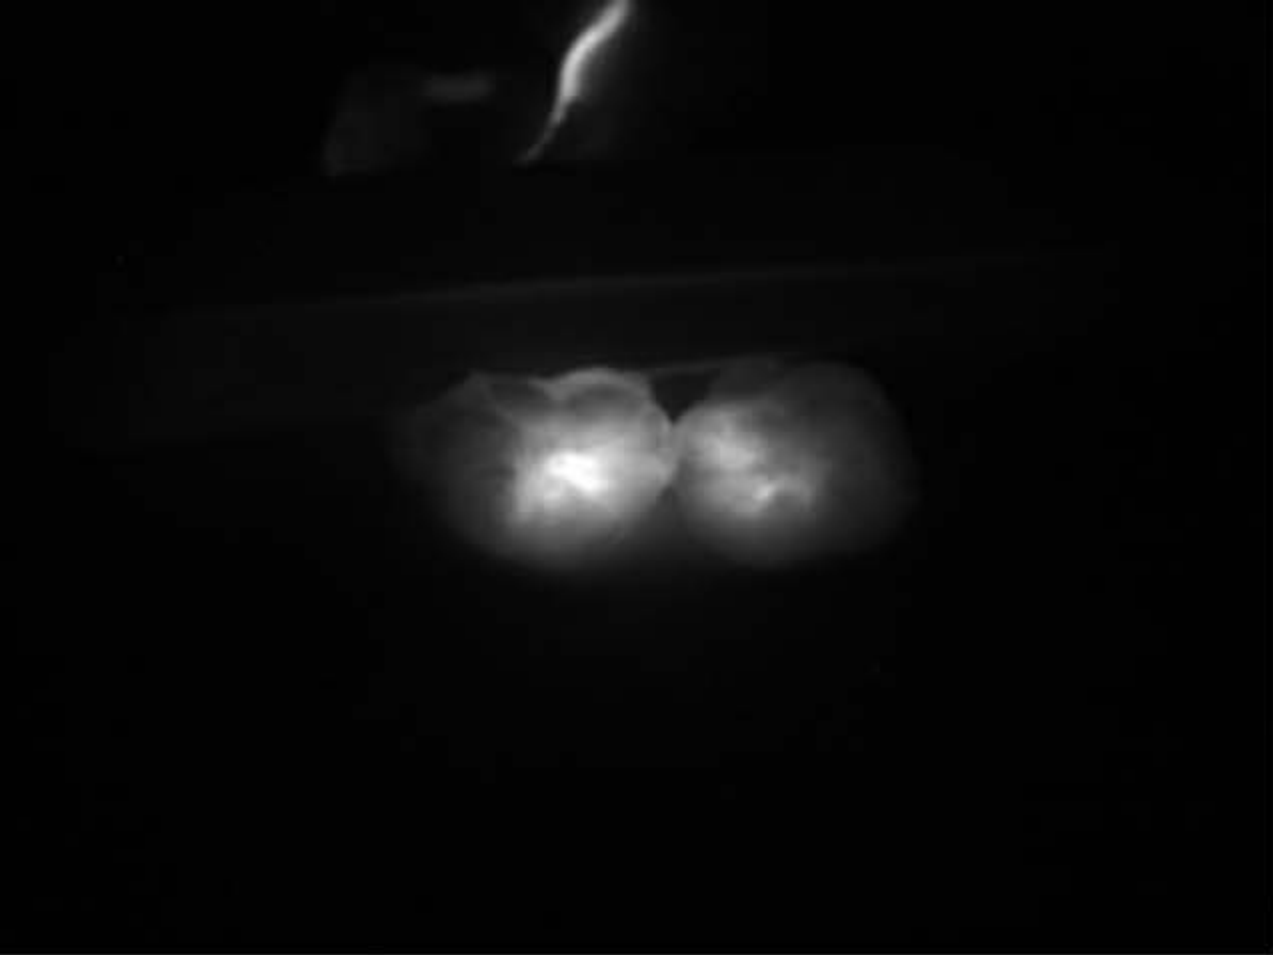

100 nmol, 75 ms

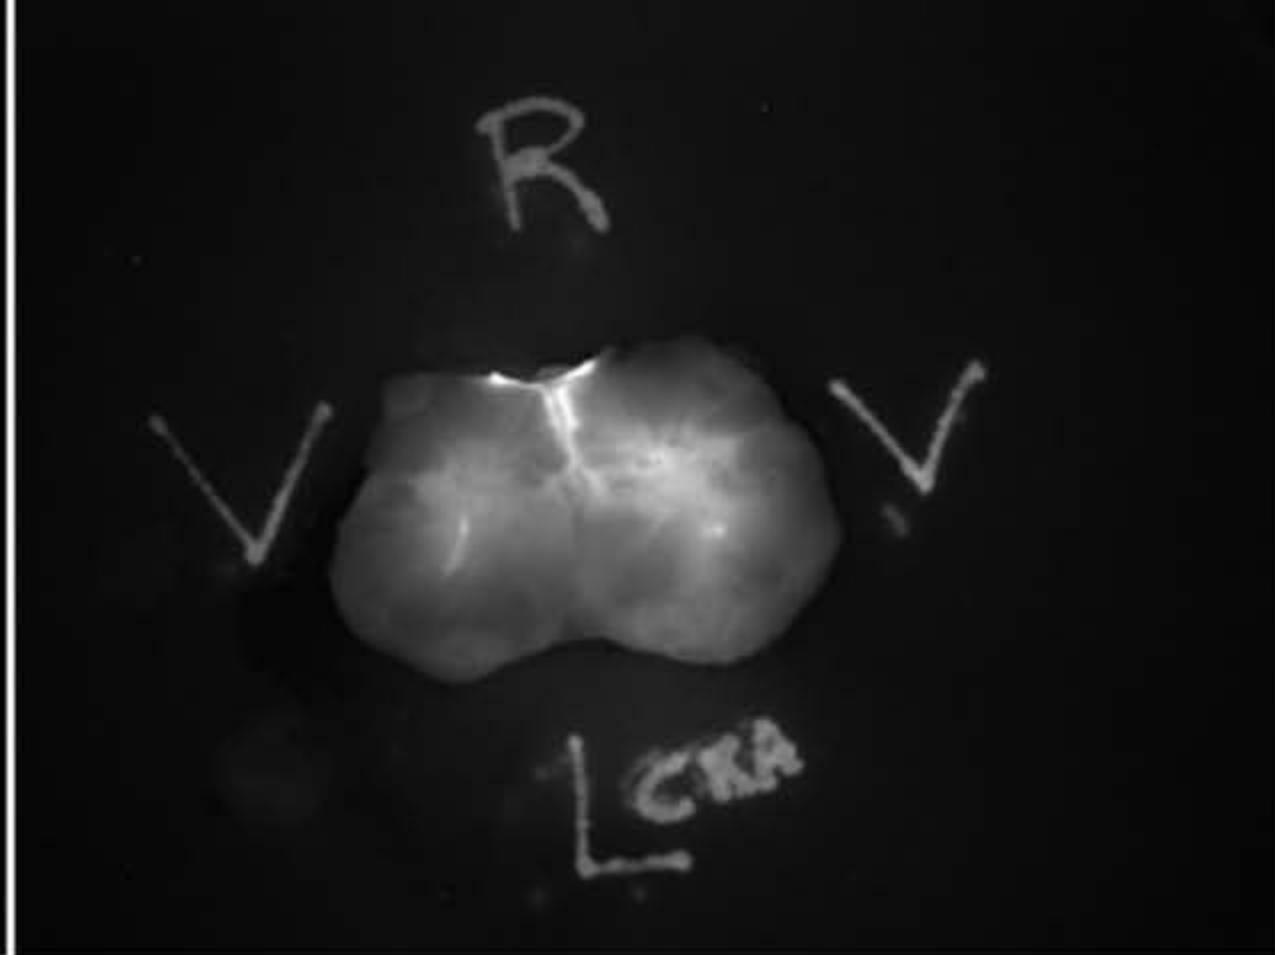

50 nmol, 500 ms

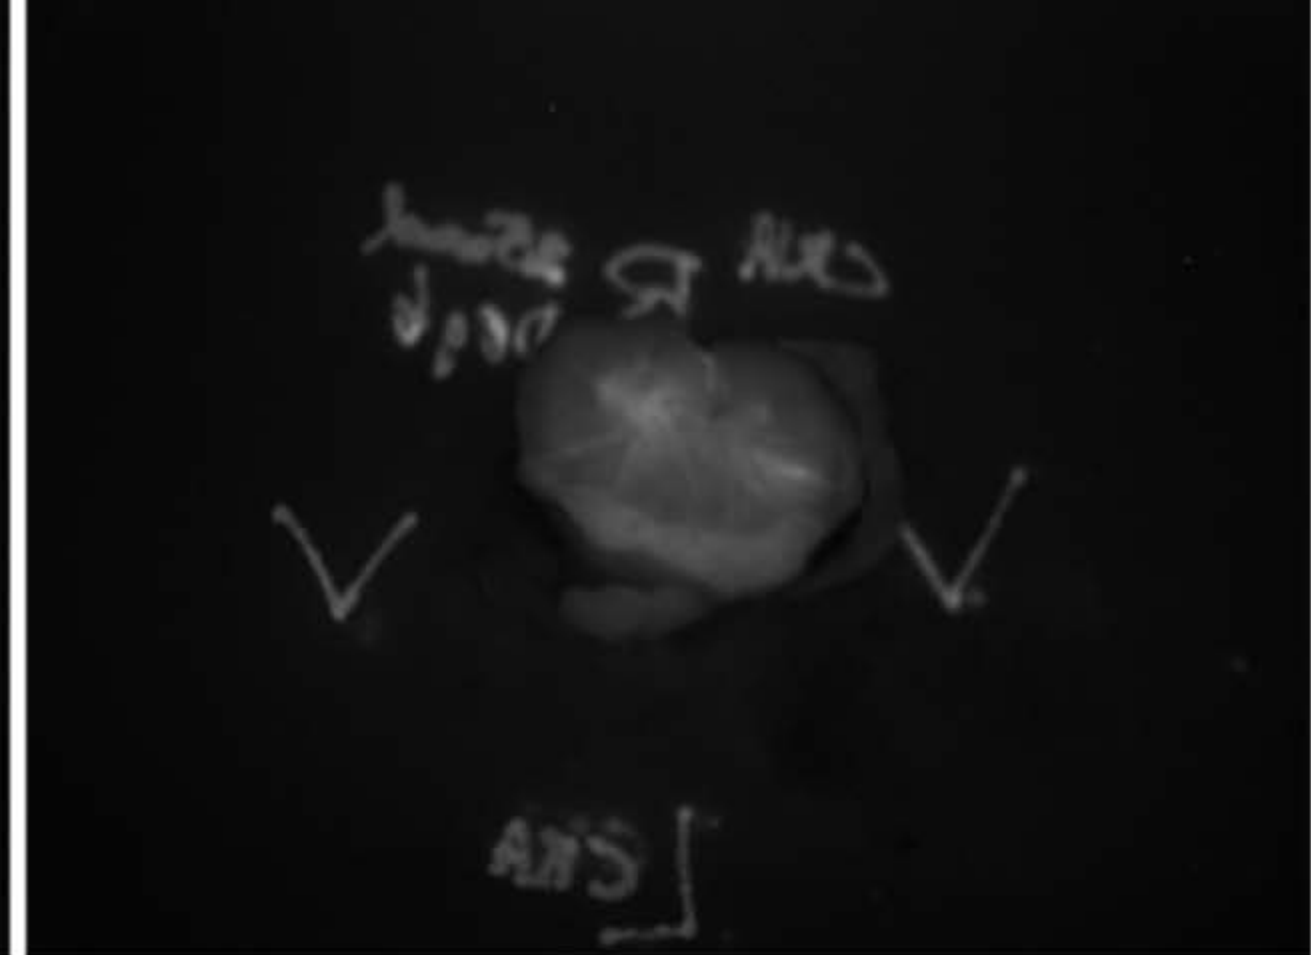

25 nmol, 500 ms

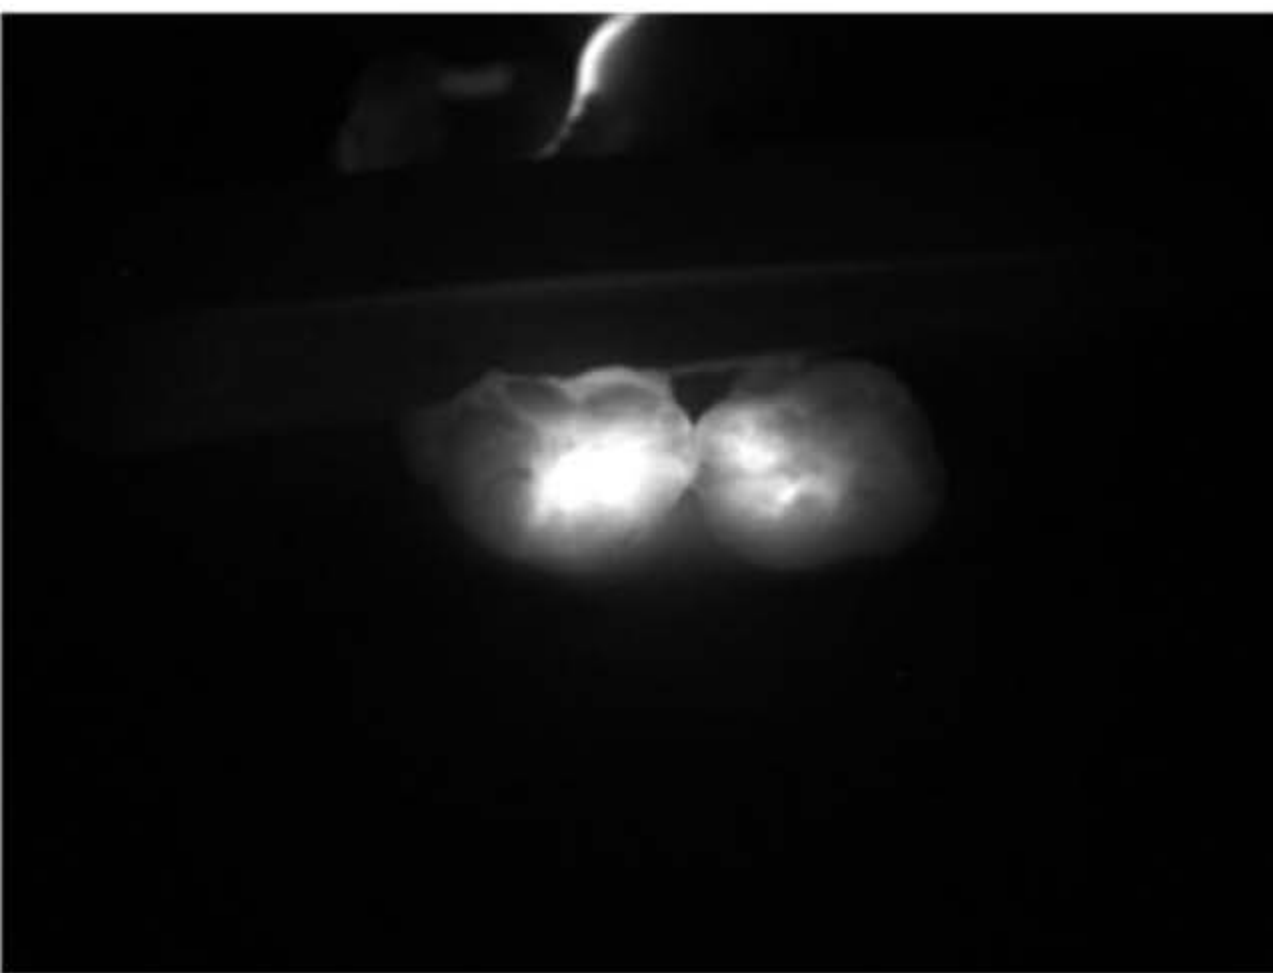

100 nmol, 100 ms

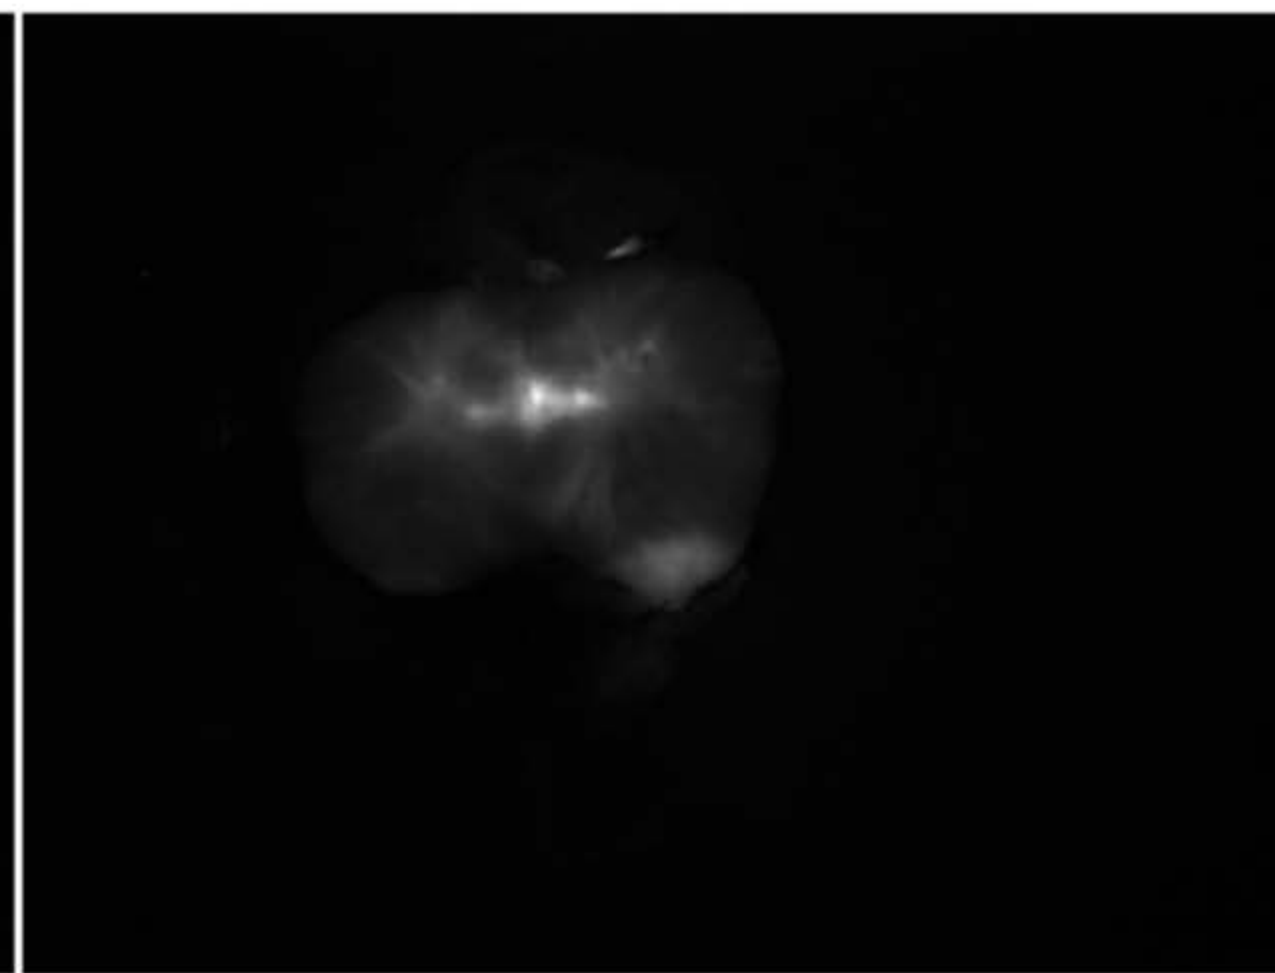

50 nmol, 150 ms

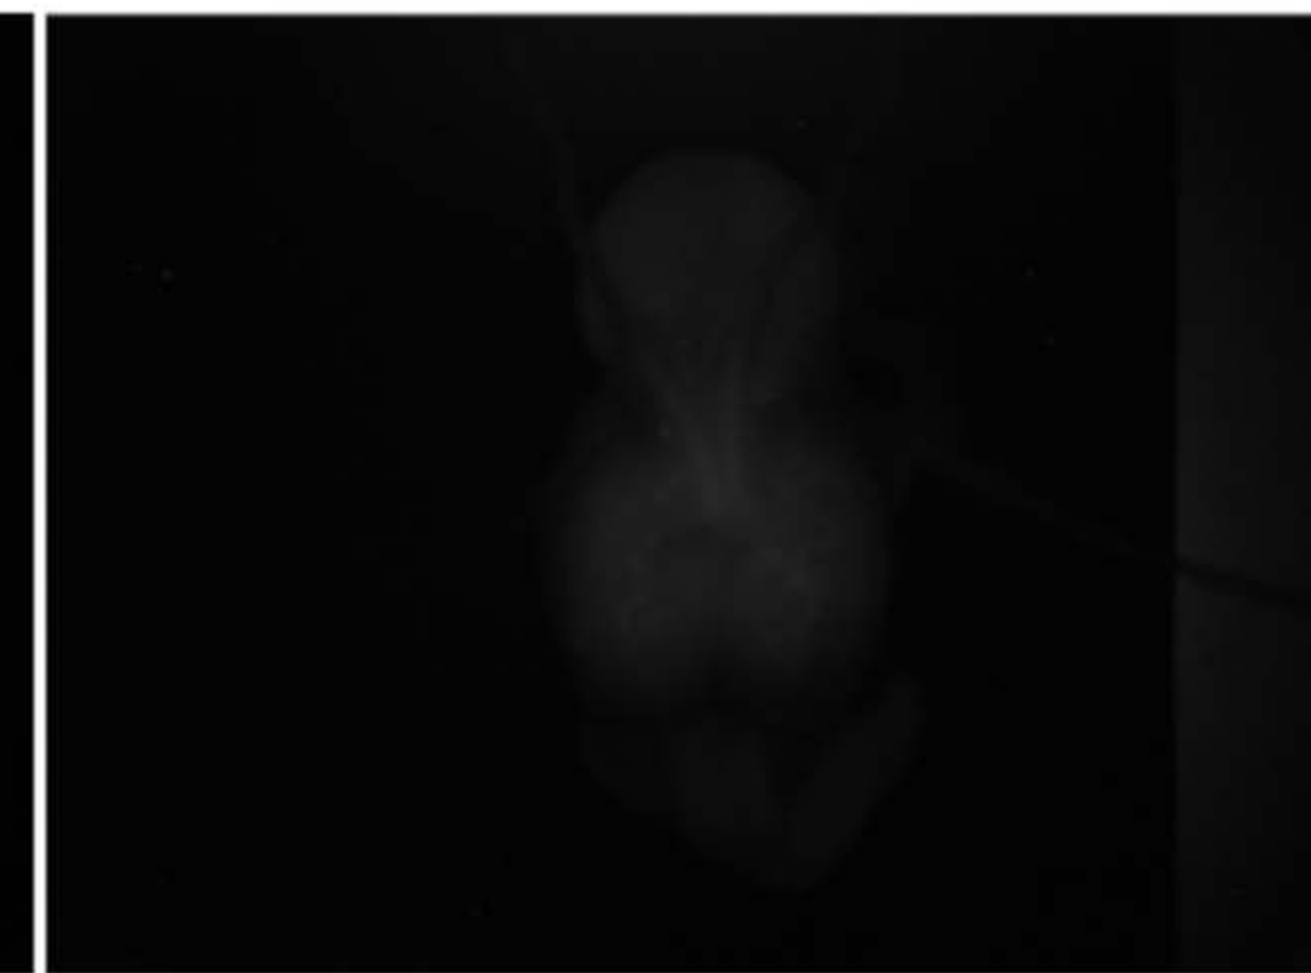

0 nmol, 750 ms

Supplement: NIHMS1015429-supplement-suppl_material.pdf [file NIHMS1015429-supplement-suppl_material.pdf]
